# Supplementary material
Source: PubMed Central journal article supplement (PMC4389129)
Supplement: supp_deu056_deu056_suppl_table1.pdf [file supp_deu056_deu056_suppl_table1.pdf]

**Supplementary Table S1** Fertility parameters (median with interquartile range) split by population-specific quartiles of birth year (Q1–Q4).

| Quartile of birth year                        | France           | Old Quebec       | Germany          | Netherlands      | Utah             | Quebec/SLSJ      |
|-----------------------------------------------|------------------|------------------|------------------|------------------|------------------|------------------|
| Age at last childbirth (years) <sup>a</sup>   |                  |                  |                  |                  |                  |                  |
| Q1                                            | 40.3 (36.8–42.9) | 41.7 (39.2–43.5) | 40.7 (36.9–42.9) | 40.3 (35.8–42.8) | 41.8 (38.6–44.0) | 41.6 (38.8–43.4) |
| Q2                                            | 40.0 (36.2–42.5) | 41.3 (38.7–43.2) | 40.3 (36.4–43.1) | 40.6 (36.8–42.9) | 41.9 (39.3–44.0) | 41.3 (38.0–43.3) |
| Q3                                            | 40.1 (36.2–42.6) | 41.2 (38.2–43.0) | 40.1 (36.3–42.8) | 40.4 (36.4–42.8) | 41.6 (38.6–43.7) | 41.3 (38.0–43.2) |
| Q4                                            | 39.6 (34.9–42.1) | 41.2 (38.3–43.2) | 37.7 (32.6–41.1) | 40.2 (36.1–42.7) | 35.9 (29.4–40.7) | 40.5 (36.1–43.0) |
| Age at marriage (years)                       |                  |                  |                  |                  |                  |                  |
| Q1                                            | 25.2 (21.7–29.8) | 21.4 (18.8–25.0) | 25.5 (22.6–29.6) | 25.5 (22.5–29.5) | 22.0 (20.0–25.0) | 21.8 (19.4–25.3) |
| Q2                                            | 25.0 (21.8–29.2) | 22.6 (20.0–26.5) | 24.9 (22.0–29.6) | 26.1 (23.1–30.1) | 20.0 (18.0–24.0) | 21.1 (19.1–24.1) |
| Q3                                            | 25.3 (21.9–29.6) | 22.3 (19.5–25.7) | 25.0 (22.8–27.7) | 25.9 (23.5–29.5) | 19.0 (17.0–20.0) | 20.3 (18.5–22.8) |
| Q4                                            | 23.9 (20.6–26.7) | 21.5 (19.1–25.2) | 25.0 (23.3–27.0) | 25.4 (22.9–28.6) | 17.0 (16.0–18.0) | 20.0 (18.3–22.4) |
| Number of children                            |                  |                  |                  |                  |                  |                  |
| Q1                                            | 6.0 (3.0–8.0)    | 10.0 (7.0–12.0)  | 6.0 (3.0–8.0)    | 5.0 (3.0–8.0)    | 8.0 (5.0–10.0)   | 10.0 (6.0–12.0)  |
| Q2                                            | 6.0 (3.0–8.0)    | 9.0 (6.0–12.0)   | 6.0 (3.0–8.0)    | 6.0 (3.0–8.0)    | 9.0 (6.0–11.0)   | 10.0 (7.0–12.0)  |
| Q3                                            | 5.0 (3.0–8.0)    | 9.0 (6.0–12.0)   | 6.0 (4.0–9.0)    | 6.0 (3.0–9.0)    | 9.0 (7.0–11.0)   | 11.0 (7.0–13.0)  |
| Q4                                            | 6.0 (4.0–8.0)    | 9.0 (6.0–12.0)   | 5.0 (3.0–8.0)    | 6.0 (3.0–9.0)    | 4.0 (2.0–7.0)    | 10.0 (7.0–13.0)  |
| Average spacing between children (years)      |                  |                  |                  |                  |                  |                  |
| Q1                                            | 2.24 (1.83–2.82) | 1.92 (1.66–2.2)  | 2.21 (1.9–2.65)  | 1.99 (1.55–2.56) | 2.33 (2.01–2.81) | 1.90 (1.65–2.14) |
| Q2                                            | 2.21 (1.8–2.7)   | 1.84 (1.6–2.17)  | 2.15 (1.74–2.63) | 2.03 (1.6–2.57)  | 2.25 (1.99–2.59) | 1.88 (1.64–2.16) |
| Q3                                            | 2.25 (1.84–2.8)  | 1.85 (1.6–2.17)  | 2.09 (1.73–2.49) | 1.98 (1.57–2.52) | 2.3 (2.05–2.65)  | 1.79 (1.55–2.09) |
| Q4                                            | 2.31 (1.88–2.86) | 1.86 (1.62–2.21) | 2.03 (1.66–2.62) | 1.99 (1.58–2.52) | 2.33 (2.08–2.66) | 1.82 (1.56–2.12) |
| Childlessness (% and 95% confidence interval) |                  |                  |                  |                  |                  |                  |
| Q1                                            | 7.3 (5.8–9.3)    | 5.8 (5.0–6.8)    | 8.3 (5.9–11.6)   | 6.4 (5.9–7.0)    | 0.37 (0.2–0.69)  | 6.7 (5.0–8.9)    |
| Q2                                            | 7.8 (6.2–9.8)    | 7.6 (6.7–8.7)    | 9.7 (7.1–13.2)   | 5.4 (4.9–5.9)    | 1.50 (1.1–2.0)   | 6.7 (5.1–8.9)    |
| Q3                                            | 7.9 (6.3–10.0)   | 6.7 (5.8–7.7)    | 4.0 (2.4–6.5)    | 4.8 (4.3–5.4)    | 2.60 (2.0–3.2)   | 4.4 (3.0–6.4)    |
| Q4                                            | 6.2 (4.8–8.1)    | 7.0 (6.1–8.1)    | 9.0 (6.4–12.5)   | 3.2 (2.8–3.7)    | 0.62 (0.37–1.0)  | 6.0 (4.3–8.2)    |

SLSJ, Saguenay-Lac-St-Jean region of Quebec.

<sup>a</sup>Estimates for age at last childbirth derived from Kaplan–Meier analysis with left censoring for age at marriage (see Methods).
